# Supplementary material for: Salt Stress Modulates the Landscape of Transcriptome and Alternative Splicing in Date Palm (Phoenix dactylifera L.)
Source: Front Plant Sci. 2022 Jan 20;12:807739. doi: 10.3389/fpls.2021.807739 (PMC8810534; doi:10.3389/fpls.2021.807739)
Supplement: Supplementary file 3 [file Table_3.XLSX]

## Sheet: 0d_TCP_vs_S_1d_T_all.go.signifi
Supplementary Table S3. Functional categories are over-represented among different stress treatment time.
Group	ID	Description	GO_Class	GeneRatio	BgRatio	pvalue	padj	Count	geneID
0 d vs 1 d	GO:0005737	cytoplasm	CC	75/3616	225/16618	3.70085e-05	0.0146184	75	evm.model.LG01.2002-gene/evm.model.LG11.668-gene/evm.model.Contig35.4-gene/evm.model.LG09.1399-gene/evm.model.LG05.1799-gene/evm.model.LG14.339-gene/evm.model.LG06.971-gene/evm.model.LG09.589-gene/evm.model.LG08.1193-gene/evm.model.LG09.1224-gene/evm.model.LG18.283-gene/evm.model.LG07.839-gene/evm.model.LG07.696-gene/evm.model.LG12.374-gene/evm.model.LG11.614-gene/evm.model.LG01.2819-gene/evm.mod…
	GO:0016787	hydrolase activity	MF	73/3616	227/16618	0.000167608	0.0243609	73	evm.model.LG12.156-gene/evm.model.LG03.883-gene/evm.model.LG17.311-gene/evm.model.LG10.308-gene/evm.model.LG01.22-gene/evm.model.LG09.1399-gene/evm.model.LG17.586-gene/evm.model.LG10.772-gene/evm.model.LG17.978-gene/evm.model.LG09.663-gene/evm.model.Contig9.4-gene/evm.model.LG01.2659-gene/evm.model.LG06.261-gene/evm.model.LG13.696-gene/evm.model.LG08.98-gene/evm.model.LG06.388-gene/evm.model.LG05…
	GO:0003924	GTPase activity	MF	64/3616	194/16618	0.00018502	0.0243609	64	evm.model.LG10.414-gene/evm.model.LG12.816-gene/evm.model.LG10.978-gene/evm.model.LG04.1711-gene/evm.model.LG08.1309-gene/evm.model.LG02.937-gene/evm.model.LG01.2829-gene/evm.model.LG13.745-gene/evm.model.LG10.869-gene/evm.model.LG09.1427-gene/evm.model.LG01.1686-gene/evm.model.LG13.142-gene/evm.model.LG14.478-gene/evm.model.LG02.373-gene/evm.model.LG02.2089-gene/evm.model.LG04.373-gene/evm.model…
	GO:0005874	microtubule	CC	15/3616	30/16618	0.000598591	0.0476498	15	evm.model.LG10.978-gene/evm.model.LG08.1309-gene/evm.model.LG02.937-gene/evm.model.LG01.2829-gene/evm.model.LG13.745-gene/evm.model.LG09.1427-gene/evm.model.LG02.373-gene/evm.model.LG02.2089-gene/evm.model.LG04.98-gene/evm.model.LG09.732-gene/evm.model.Contig149.1-gene/evm.model.Contig15.9-gene/evm.model.LG08.1360-gene/evm.model.LG08.1695-gene/evm.model.LG11.723-gene
	GO:0007017	microtubule-based process	BP	18/3616	39/16618	0.000603162	0.0476498	18	evm.model.LG10.978-gene/evm.model.LG08.1309-gene/evm.model.LG02.937-gene/evm.model.LG01.2829-gene/evm.model.LG13.745-gene/evm.model.LG09.1427-gene/evm.model.LG02.373-gene/evm.model.LG02.2089-gene/evm.model.LG04.98-gene/evm.model.LG09.732-gene/evm.model.Contig149.1-gene/evm.model.Contig15.9-gene/evm.model.LG01.1438-gene/evm.model.LG08.1360-gene/evm.model.LG18.249-gene/evm.model.LG08.1695-gene/evm.…
0 d vs 5 d	GO:0015979	photosynthesis	BP	35/5525	55/16618	3.75157e-06	0.00151939	35	evm.model.LG10.232-gene/evm.model.LG07.690-gene/evm.model.LG14.608-gene/evm.model.LG08.1253-gene/evm.model.LG02.1765-gene/evm.model.LG15.724-gene/evm.model.LG01.851-gene/evm.model.LG08.1616-gene/evm.model.LG18.583-gene/evm.model.LG01.2105-gene/evm.model.LG12.842-gene/evm.model.LG02.1666-gene/evm.model.LG03.960-gene/evm.model.LG08.1288-gene/evm.model.LG10.347-gene/evm.model.LG09.571-gene/evm.model…
	GO:0016787	hydrolase activity	MF	104/5525	227/16618	5.04636e-05	0.00768626	104	evm.model.LG03.883-gene/evm.model.LG17.978-gene/evm.model.LG09.1399-gene/evm.model.LG10.308-gene/evm.model.LG09.663-gene/evm.model.LG10.1098-gene/evm.model.LG14.700-gene/evm.model.LG10.772-gene/evm.model.LG04.918-gene/evm.model.LG08.1758-gene/evm.model.LG17.311-gene/evm.model.LG01.1296-gene/evm.model.LG02.2446-gene/evm.model.LG09.1259-gene/evm.model.LG06.486-gene/evm.model.LG14.842-gene/evm.model…
	GO:0005737	cytoplasm	CC	103/5525	225/16618	5.69352e-05	0.00768626	103	evm.model.LG05.1799-gene/evm.model.LG16.1219-gene/evm.model.LG07.36-gene/evm.model.LG09.1399-gene/evm.model.LG11.668-gene/evm.model.LG02.2012-gene/evm.model.LG01.2002-gene/evm.model.LG04.635-gene/evm.model.LG07.696-gene/evm.model.LG12.374-gene/evm.model.LG06.1253-gene/evm.model.LG09.589-gene/evm.model.LG09.1224-gene/evm.model.LG16.36-gene/evm.model.LG14.339-gene/evm.model.LG10.551-gene/evm.model.…
	GO:0009086	methionine biosynthetic process	BP	10/5525	11/16618	0.000126036	0.0127611	10	evm.model.LG12.971-gene/evm.model.LG01.1854-gene/evm.model.LG08.1109-gene/evm.model.LG10.1105-gene/evm.model.LG01.1987-gene/evm.model.LG18.195-gene/evm.model.LG15.276-gene/evm.model.LG16.50-gene/evm.model.LG15.274-gene/evm.model.LG05.58-gene
	GO:0009522	photosystem I	CC	12/5525	15/16618	0.00027563	0.0186666	12	evm.model.LG14.608-gene/evm.model.LG08.1253-gene/evm.model.LG01.851-gene/evm.model.LG01.2105-gene/evm.model.LG12.842-gene/evm.model.LG02.1666-gene/evm.model.LG03.960-gene/evm.model.LG07.700-gene/evm.model.LG08.449-gene/evm.model.LG06.1357-gene/evm.model.LG08.1321-gene/evm.model.LG04.904-gene
	GO:0004812	aminoacyl-tRNA ligase activity	MF	29/5525	50/16618	0.000276542	0.0186666	29	evm.model.LG01.2002-gene/evm.model.LG12.374-gene/evm.model.LG02.424-gene/evm.model.LG12.382-gene/evm.model.LG02.1576-gene/evm.model.LG01.2023-gene/evm.model.LG12.383-gene/evm.model.LG02.363-gene/evm.model.LG08.358-gene/evm.model.LG06.299-gene/evm.model.LG05.192-gene/evm.model.LG01.1276-gene/evm.model.LG05.902-gene/evm.model.LG09.586-gene/evm.model.LG09.1572-gene/evm.model.LG02.2610-gene/evm.model…
	GO:0009507	chloroplast	CC	12/5525	16/16618	0.000767406	0.0443999	12	evm.model.LG08.1616-gene/evm.model.LG04.1270-gene/evm.model.LG14.587-gene/evm.model.LG15.731-gene/evm.model.LG03.93-gene/evm.model.LG02.1745-gene/evm.model.LG15.487-gene/evm.model.LG06.1426-gene/evm.model.LG02.2208-gene/evm.model.LG02.1285-gene/evm.model.LG01.209-gene/evm.model.LG01.2714-gene
0 d vs 10 d	GO:0015979	photosynthesis	BP	41/6433	55/16618	6.95576e-08	2.83795e-05	41	evm.model.LG10.232-gene/evm.model.LG15.724-gene/evm.model.LG02.1666-gene/evm.model.LG18.583-gene/evm.model.LG02.1765-gene/evm.model.LG15.707-gene/evm.model.LG08.1253-gene/evm.model.LG08.1616-gene/evm.model.LG07.690-gene/evm.model.LG07.446-gene/evm.model.LG14.608-gene/evm.model.LG08.1321-gene/evm.model.LG17.909-gene/evm.model.LG03.960-gene/evm.model.LG09.571-gene/evm.model.LG01.1472-gene/evm.model…
	GO:0016760	cellulose synthase (UDP-forming) activity	MF	23/6433	31/16618	6.4281e-05	0.00742335	23	evm.model.LG03.1112-gene/evm.model.LG18.569-gene/evm.model.LG05.2078-gene/evm.model.LG12.789-gene/evm.model.LG12.788-gene/evm.model.LG12.141-gene/evm.model.LG10.1665-gene/evm.model.Contig56.4-gene/evm.model.LG07.87-gene/evm.model.LG13.128-gene/evm.model.LG02.667-gene/evm.model.Contig56.1-gene/evm.model.LG02.2341-gene/evm.model.LG12.784-gene/evm.model.LG12.1474-gene/evm.model.LG14.715-gene/evm.mod…
	GO:0030244	cellulose biosynthetic process	BP	23/6433	31/16618	6.4281e-05	0.00742335	23	evm.model.LG03.1112-gene/evm.model.LG18.569-gene/evm.model.LG05.2078-gene/evm.model.LG12.789-gene/evm.model.LG12.788-gene/evm.model.LG12.141-gene/evm.model.LG10.1665-gene/evm.model.Contig56.4-gene/evm.model.LG07.87-gene/evm.model.LG13.128-gene/evm.model.LG02.667-gene/evm.model.Contig56.1-gene/evm.model.LG02.2341-gene/evm.model.LG12.784-gene/evm.model.LG12.1474-gene/evm.model.LG14.715-gene/evm.mod…
	GO:0009654	photosystem II oxygen evolving complex	CC	20/6433	26/16618	8.32773e-05	0.00742335	20	evm.model.LG10.232-gene/evm.model.LG15.724-gene/evm.model.LG18.583-gene/evm.model.LG07.690-gene/evm.model.LG17.909-gene/evm.model.LG09.571-gene/evm.model.LG06.929-gene/evm.model.LG01.1577-gene/evm.model.LG10.347-gene/evm.model.LG08.1288-gene/evm.model.LG01.1189-gene/evm.model.LG08.651-gene/evm.model.LG03.993-gene/evm.model.LG07.1038-gene/evm.model.LG03.949-gene/evm.model.LG01.2672-gene/evm.model.…
	GO:0016787	hydrolase activity	MF	116/6433	227/16618	9.09725e-05	0.00742335	116	evm.model.LG12.156-gene/evm.model.LG09.1399-gene/evm.model.LG10.772-gene/evm.model.LG10.308-gene/evm.model.LG09.1305-gene/evm.model.LG07.630-gene/evm.model.LG07.1076-gene/evm.model.LG14.842-gene/evm.model.LG10.1098-gene/evm.model.LG01.2275-gene/evm.model.LG01.2035-gene/evm.model.LG06.486-gene/evm.model.LG01.2659-gene/evm.model.LG14.700-gene/evm.model.LG06.487-gene/evm.model.LG09.1141-gene/evm.mod…
	GO:0009523	photosystem II	CC	21/6433	29/16618	0.000239331	0.0162745	21	evm.model.LG10.232-gene/evm.model.LG15.724-gene/evm.model.LG18.583-gene/evm.model.LG08.1616-gene/evm.model.LG07.690-gene/evm.model.LG07.446-gene/evm.model.LG17.909-gene/evm.model.LG09.571-gene/evm.model.LG06.929-gene/evm.model.LG01.1577-gene/evm.model.LG10.347-gene/evm.model.LG08.1288-gene/evm.model.LG03.993-gene/evm.model.LG07.1038-gene/evm.model.LG03.949-gene/evm.model.LG01.2672-gene/evm.model.…
0 d vs 13 d	GO:0015979	photosynthesis	BP	50/9971	55/16618	3.24069e-07	0.000132868	50	evm.model.LG15.805-gene/evm.model.LG01.851-gene/evm.model.LG15.707-gene/evm.model.LG08.1321-gene/evm.model.LG02.1765-gene/evm.model.LG10.347-gene/evm.model.LG01.1577-gene/evm.model.LG07.446-gene/evm.model.LG14.608-gene/evm.model.LG08.1253-gene/evm.model.LG08.1616-gene/evm.model.LG09.571-gene/evm.model.LG04.904-gene/evm.model.LG08.449-gene/evm.model.LG03.960-gene/evm.model.LG15.724-gene/evm.model.…
	GO:0006886	intracellular protein transport	BP	100/9971	129/16618	1.82907e-05	0.00374959	100	evm.model.LG02.60-gene/evm.model.LG04.92-gene/evm.model.LG04.1370-gene/evm.model.LG04.1267-gene/evm.model.LG09.765-gene/evm.model.LG10.1253-gene/evm.model.LG08.1340-gene/evm.model.LG11.248-gene/evm.model.LG02.1219-gene/evm.model.LG05.1441-gene/evm.model.LG10.426-gene/evm.model.LG17.991-gene/evm.model.LG07.367-gene/evm.model.LG13.856-gene/evm.model.LG03.988-gene/evm.model.LG13.656-gene/evm.model.L…
	GO:0005525	GTP binding	MF	194/9971	274/16618	0.000115267	0.0129468	194	evm.model.LG01.2722-gene/evm.model.LG15.75-gene/evm.model.LG03.1286-gene/evm.model.LG10.978-gene/evm.model.LG02.937-gene/evm.model.LG05.636-gene/evm.model.LG01.2781-gene/evm.model.LG14.57-gene/evm.model.LG03.977-gene/evm.model.LG10.414-gene/evm.model.LG09.1811-gene/evm.model.LG08.1360-gene/evm.model.LG04.1270-gene/evm.model.LG05.628-gene/evm.model.LG04.92-gene/evm.model.LG01.700-gene/evm.model.LG…
	GO:0016787	hydrolase activity	MF	163/9971	227/16618	0.000126311	0.0129468	163	evm.model.LG13.472-gene/evm.model.LG09.1141-gene/evm.model.LG07.1076-gene/evm.model.LG09.1399-gene/evm.model.LG01.2275-gene/evm.model.LG04.729-gene/evm.model.LG06.1182-gene/evm.model.LG06.388-gene/evm.model.LG10.1098-gene/evm.model.LG17.586-gene/evm.model.LG02.2446-gene/evm.model.LG09.222-gene/evm.model.LG01.1961-gene/evm.model.LG03.590-gene/evm.model.LG11.448-gene/evm.model.LG07.846-gene/evm.mod…
	GO:0009654	photosystem II oxygen evolving complex	CC	24/9971	26/16618	0.000275421	0.0225846	24	evm.model.LG10.347-gene/evm.model.LG01.1577-gene/evm.model.LG08.651-gene/evm.model.LG01.1189-gene/evm.model.LG09.571-gene/evm.model.LG15.724-gene/evm.model.LG08.1288-gene/evm.model.LG06.929-gene/evm.model.LG07.690-gene/evm.model.LG01.2672-gene/evm.model.LG17.909-gene/evm.model.LG10.232-gene/evm.model.LG18.583-gene/evm.model.LG01.2708-gene/evm.model.LG07.1038-gene/evm.model.LG03.993-gene/evm.model…
	GO:0000166	nucleotide binding	MF	94/9971	126/16618	0.00039992	0.0240284	94	evm.model.LG16.361-gene/evm.model.LG01.2002-gene/evm.model.LG01.2023-gene/evm.model.LG12.374-gene/evm.model.LG05.192-gene/evm.model.LG17.887-gene/evm.model.LG02.1285-gene/evm.model.LG02.363-gene/evm.model.LG05.902-gene/evm.model.LG02.1576-gene/evm.model.LG12.1538-gene/evm.model.LG02.527-gene/evm.model.LG08.358-gene/evm.model.LG09.1945-gene/evm.model.LG09.1012-gene/evm.model.LG05.1491-gene/evm.mod…
	GO:0042026	protein refolding	BP	15/9971	15/16618	0.000468348	0.0240284	15	evm.model.LG16.36-gene/evm.model.LG07.839-gene/evm.model.LG02.2012-gene/evm.model.LG06.104-gene/evm.model.LG07.696-gene/evm.model.LG04.907-gene/evm.model.LG13.157-gene/evm.model.LG07.205-gene/evm.model.LG12.172-gene/evm.model.LG08.116-gene/evm.model.LG11.840-gene/evm.model.LG16.1065-gene/evm.model.LG11.838-gene/evm.model.LG04.718-gene/evm.model.LG13.819-gene
	GO:0009523	photosystem II	CC	26/9971	29/16618	0.000468848	0.0240284	26	evm.model.LG15.805-gene/evm.model.LG10.347-gene/evm.model.LG01.1577-gene/evm.model.LG07.446-gene/evm.model.LG08.1616-gene/evm.model.LG09.571-gene/evm.model.LG15.724-gene/evm.model.LG08.1288-gene/evm.model.LG06.929-gene/evm.model.LG07.690-gene/evm.model.LG01.2672-gene/evm.model.LG17.909-gene/evm.model.LG10.232-gene/evm.model.LG18.583-gene/evm.model.LG01.2708-gene/evm.model.LG07.1038-gene/evm.model…
	GO:0005737	cytoplasm	CC	158/9971	225/16618	0.000867383	0.0395141	158	evm.model.LG05.1799-gene/evm.model.LG16.361-gene/evm.model.LG16.36-gene/evm.model.LG01.2002-gene/evm.model.LG01.2023-gene/evm.model.LG07.839-gene/evm.model.LG09.1399-gene/evm.model.LG12.374-gene/evm.model.LG11.90-gene/evm.model.LG06.983-gene/evm.model.LG02.1285-gene/evm.model.LG02.2012-gene/evm.model.LG09.1224-gene/evm.model.LG02.1576-gene/evm.model.LG06.104-gene/evm.model.LG17.284-gene/evm.model…
	GO:0009451	RNA modification	BP	17/9971	18/16618	0.00131468	0.0490015	17	evm.model.LG04.692-gene/evm.model.LG17.838-gene/evm.model.LG07.1158-gene/evm.model.LG07.1024-gene/evm.model.LG03.135-gene/evm.model.LG12.1242-gene/evm.model.LG09.330-gene/evm.model.LG14.482-gene/evm.model.LG04.134-gene/evm.model.LG05.744-gene/evm.model.LG01.1845-gene/evm.model.LG01.1846-gene/evm.model.LG17.334-gene/evm.model.LG17.136-gene/evm.model.LG16.629-gene/evm.model.LG02.255-gene/evm.model.…
	GO:0009982	pseudouridine synthase activity	MF	17/9971	18/16618	0.00131468	0.0490015	17	evm.model.LG04.692-gene/evm.model.LG17.838-gene/evm.model.LG07.1158-gene/evm.model.LG07.1024-gene/evm.model.LG03.135-gene/evm.model.LG12.1242-gene/evm.model.LG09.330-gene/evm.model.LG14.482-gene/evm.model.LG04.134-gene/evm.model.LG05.744-gene/evm.model.LG01.1845-gene/evm.model.LG01.1846-gene/evm.model.LG17.334-gene/evm.model.LG17.136-gene/evm.model.LG16.629-gene/evm.model.LG02.255-gene/evm.model.…
